# Supplementary material for: Massively Parallel Sequencing and Analysis of the Necator americanus Transcriptome
Source: PLoS Negl Trop Dis. 2010 May 11;4(5):e684. doi: 10.1371/journal.pntd.0000684 (PMC2867931; doi:10.1371/journal.pntd.0000684)
Supplement: Table S2 — Gene Ontology (GO) terms (according to the categories ‘biological process’, ‘cellular component’ and ‘molecular function’) linked to peptides predicted for Necator americanus and Ancylostoma caninum. (0.16 MB XLS) [file pntd.0000684.s002.xls]

## Sheet: N. americanus
GO category	GO description (Necator americanus)	No. of ESTs
Biological Process	translation	599
	metabolic process	438
	proteolysis	329
	oxidation reduction	197
	protein amino acid phosphorylation	147
	regulation of transcription, DNA-dependent	137
	transport	134
	ATP synthesis coupled proton transport	111
	protein folding	104
	carbohydrate metabolic process	101
	small GTPase mediated signal transduction	62
	ubiquitin-dependent protein catabolic process	61
	intracellular protein transport	59
	vesicle-mediated transport	54
	nucleosome assembly	53
	protein transport	50
	response to oxidative stress	48
	protein amino acid dephosphorylation	47
	protein polymerization	46
	transcription	46
	signal transduction	43
	intracellular signaling cascade	42
	translational initiation	40
	cellular protein metabolic process	39
	protein modification process	39
	regulation of transcription	39
	cell redox homeostasis	37
	post-translational protein modification	37
	regulation of protein metabolic process	37
	RNA processing	35
	tRNA aminoacylation for protein translation	33
	mitochondrial electron transport, ubiquinol to cytochrome c	32
	glycolysis	29
	biosynthetic process	28
	lipid metabolic process	28
	superoxide metabolic process	27
	cellular process	26
	ion transport	24
	microtubule-based process	24
	translational elongation	24
	neuropeptide signaling pathway	23
	cation transport	22
	cyclic nucleotide biosynthetic process	21
	dephosphorylation	21
	nucleobase, nucleoside, nucleotide and nucleic acid metabolic process	21
	response to stress	21
	regulation of actin filament polymerization	20
	transcription initiation from RNA polymerase II promoter	20
	oxygen transport	18
	CTP biosynthetic process	17
	GTP biosynthetic process	17
	UTP biosynthetic process	17
	one-carbon compound metabolic process	16
	amino acid metabolic process	15
	proteolysis involved in cellular protein catabolic process	15
	rRNA processing	15
	DNA repair	14
	lipid transport	14
	cellular metabolic process	13
	copper ion transport	13
	cytoskeleton organization	13
	protein amino acid glycosylation	13
	SRP-dependent cotranslational protein targeting to membrane	13
	tetrahydrobiopterin biosynthetic process	13
	gluconeogenesis	12
	G-protein coupled receptor protein signaling pathway	12
	DNA replication	11
	methionine salvage	11
	Mo-molybdopterin cofactor biosynthetic process	11
	signal peptide processing	11
	vesicle docking during exocytosis	11
	glycogen biosynthetic process	10
	transcription initiation	10
	transcription, DNA-dependent	10
	trehalose metabolic process	10
	cell adhesion	9
	chromatin assembly or disassembly	9
	folic acid and derivative biosynthetic process	9
	glucose metabolic process	9
	glutathione biosynthetic process	9
	metal ion transport	9
	mRNA processing	9
	sodium ion transport	9
	tricarboxylic acid cycle	9
	actin cytoskeleton organization	8
	aromatic amino acid family metabolic process	8
	ATP biosynthetic process	8
	iron-sulfur cluster assembly	8
	malate metabolic process	8
	microtubule-based movement	8
	nitrogen compound metabolic process	8
	regulation of Rab GTPase activity	8
	regulation of transcription from RNA polymerase II promoter	8
	tRNA modification	8
	anion transport	7
	cell communication	7
	cell cycle	7
	cobalamin biosynthetic process	7
	fatty acid metabolic process	7
	mitosis	7
	negative regulation of translational elongation	7
	response to metal ion	7
	transcription from RNA polymerase II promoter	7
	tRNA processing	7
	autophagy	6
	cellular iron ion homeostasis	6
	inositol biosynthetic process	6
	intracellular transport	6
	L-phenylalanine catabolic process	6
	monovalent inorganic cation transport	6
	nucleoside metabolic process	6
	phosphate transport	6
	phospholipid biosynthetic process	6
	positive regulation of translational elongation	6
	positive regulation of translational termination	6
	protein retention in ER lumen	6
	protein targeting	6
	purine nucleotide biosynthetic process	6
	purine ribonucleoside monophosphate biosynthetic process	6
	translational frameshifting	6
	tubulin complex assembly	6
	tyrosine metabolic process	6
	amino acid transport	5
	carbohydrate transport	5
	cell surface receptor linked signal transduction	5
	cellular carbohydrate metabolic process	5
	chitin metabolic process	5
	chromatin remodeling	5
	D-amino acid catabolic process	5
	deoxyribonucleoside diphosphate metabolic process	5
	ER to Golgi vesicle-mediated transport	5
	glycerol-3-phosphate metabolic process	5
	glycine catabolic process	5
	glycine metabolic process	5
	histidine catabolic process	5
	mature ribosome assembly	5
	multicellular organismal development	5
	nuclear mRNA splicing, via spliceosome	5
	nucleotide-excision repair	5
	phosphate metabolic process	5
	protein metabolic process	5
	queuosine biosynthetic process	5
	regulation of DNA replication	5
	spermidine biosynthetic process	5
	steroid metabolic process	5
	tetrahydrofolate biosynthetic process	5
	aerobic respiration	4
	apoptosis	4
	cell cycle arrest	4
	copper ion homeostasis	4
	deadenylation-dependent decapping of nuclear-transcribed mRNA	4
	DNA metabolic process	4
	electron transport chain	4
	fructose 2,6-bisphosphate metabolic process	4
	glycerol metabolic process	4
	GPI anchor biosynthetic process	4
	lipid catabolic process	4
	methionine biosynthetic process	4
	mitochondrial electron transport, cytochrome c to oxygen	4
	NAD biosynthetic process	4
	negative regulation of microtubule depolymerization	4
	pentose-phosphate shunt, non-oxidative branch	4
	peptidoglycan catabolic process	4
	peptidyl-lysine modification to hypusine	4
	phosphoinositide phosphorylation	4
	phosphoinositide-mediated signaling	4
	prolyl-tRNA aminoacylation	4
	protein amino acid N-linked glycosylation via asparagine	4
	protein amino acid prenylation	4
	protein catabolic process	4
	pseudouridine synthesis	4
	regulation of signal transduction	4
	ribosome biogenesis	4
	RNA modification	4
	tryptophan catabolic process	4
	ubiquinone biosynthetic process	4
	acetyl-CoA metabolic process	3
	carbon utilization	3
	carboxylic acid metabolic process	3
	cellular aldehyde metabolic process	3
	chromatin silencing	3
	dicarboxylic acid transport	3
	glutaminyl-tRNA aminoacylation	3
	glycine biosynthetic process	3
	homophilic cell adhesion	3
	iron ion transport	3
	isocitrate metabolic process	3
	lipoate biosynthetic process	3
	methylation	3
	negative regulation of transcription	3
	nucleotide biosynthetic process	3
	pentose-phosphate shunt	3
	phenylalanyl-tRNA aminoacylation	3
	phosphatidylserine biosynthetic process	3
	proteasomal ubiquitin-dependent protein catabolic process	3
	protein amino acid deacetylation	3
	protein thiol-disulfide exchange	3
	proton transport	3
	regulation of mitotic metaphase/anaphase transition	3
	regulation of protein catabolic process	3
	response to biotic stimulus	3
	RNA splicing	3
	rRNA methylation	3
	spermine biosynthetic process	3
	vacuolar transport	3
	actin filament polymerization	2
	activation of protein kinase C activity by G-protein coupled receptor protein signaling pathway	2
	acyl-CoA metabolic process	2
	asparagine biosynthetic process	2
	ATP hydrolysis coupled proton transport	2
	ATP synthesis coupled electron transport	2
	autophagic vacuole formation	2
	cell-matrix adhesion	2
	cellular aromatic compound metabolic process	2
	chloride transport	2
	coenzyme A biosynthetic process	2
	cotranslational protein targeting to membrane	2
	cytidine metabolic process	2
	DNA integration	2
	double-strand break repair via nonhomologous end joining	2
	dUTP metabolic process	2
	exocytosis	2
	fatty acid beta-oxidation	2
	galactose metabolic process	2
	gamma-aminobutyric acid metabolic process	2
	GDP-mannose metabolic process	2
	glycolipid transport	2
	hexose metabolic process	2
	histidyl-tRNA aminoacylation	2
	integrin-mediated signaling pathway	2
	isoprenoid biosynthetic process	2
	L-serine metabolic process	2
	macromolecule biosynthetic process	2
	mannose biosynthetic process	2
	mannose metabolic process	2
	mismatch repair	2
	negative regulation of nucleotide metabolic process	2
	negative regulation of protein kinase activity	2
	neurotransmitter transport	2
	nucleocytoplasmic transport	2
	nucleotide catabolic process	2
	oligosaccharide biosynthetic process	2
	phosphoenolpyruvate-dependent sugar phosphotransferase system	2
	phospholipid metabolic process	2
	positive regulation of catalytic activity	2
	potassium ion transport	2
	protein import into mitochondrial inner membrane	2
	protein processing	2
	protein targeting to mitochondrion	2
	regulation of GTPase activity	2
	regulation of phosphorylation	2
	regulation of translational fidelity	2
	regulation of translational initiation	2
	retrograde vesicle-mediated transport, Golgi to ER	2
	spliceosome assembly	2
	tRNA splicing, via endonucleolytic cleavage and ligation	2
	tryptophan catabolic process to kynurenine	2
	valine metabolic process	2
	valyl-tRNA aminoacylation	2
	acyl-CoA biosynthetic process	1
	arginine metabolic process	1
	branched chain family amino acid metabolic process	1
	carnitine biosynthetic process	1
	cell wall macromolecule catabolic process	1
	cellular metal ion homeostasis	1
	ceramide metabolic process	1
	cysteinyl-tRNA aminoacylation	1
	deoxyribonucleotide catabolic process	1
	DNA methylation	1
	ergosterol biosynthetic process	1
	fatty acid biosynthetic process	1
	fructose metabolic process	1
	glycosaminoglycan biosynthetic process	1
	glycyl-tRNA aminoacylation	1
	glyoxylate cycle	1
	histone deacetylation	1
	IMP biosynthetic process	1
	intein-mediated protein splicing	1
	intra-Golgi vesicle-mediated transport	1
	leukotriene biosynthetic process	1
	lipid glycosylation	1
	L-serine biosynthetic process	1
	lysosome organization	1
	lysyl-tRNA aminoacylation	1
	microtubule cytoskeleton organization	1
	mitochondrial fusion	1
	mRNA capping	1
	mRNA catabolic process	1
	peptidyl-amino acid modification	1
	peptidyl-histidine phosphorylation	1
	phosphatidylinositol metabolic process	1
	phosphorylation	1
	phytochelatin biosynthetic process	1
	proline biosynthetic process	1
	protein arginylation	1
	protein complex assembly	1
	protein import into peroxisome matrix, docking	1
	protein insertion into membrane	1
	protein localization	1
	protein neddylation	1
	protein ubiquitination	1
	pyridoxine biosynthetic process	1
	regulation of phosphoprotein phosphatase activity	1
	regulation of small GTPase mediated signal transduction	1
	respiratory electron transport chain	1
	riboflavin biosynthetic process	1
	ribosome assembly	1
	RNA capping	1
	RNA methylation	1
	sphingolipid metabolic process	1
	translational termination	1
	tRNA methylation	1
	tryptophanyl-tRNA aminoacylation	1
	UMP biosynthetic process	1
Biological Process Total		4839
Cellular Component	intracellular	798
	ribosome	499
	membrane	286
	nucleus	280
	integral to membrane	185
	cytoplasm	141
	extracellular region	86
	nucleosome	51
	protein complex	46
	endoplasmic reticulum	38
	mitochondrion	36
	cytoskeleton	33
	microtubule	31
	proton-transporting two-sector ATPase complex, catalytic domain	29
	proton-transporting two-sector ATPase complex, proton-transporting domain	27
	mitochondrial inner membrane	22
	proton-transporting ATP synthase complex, catalytic core F(1)	18
	clathrin adaptor complex	15
	proteasome core complex	15
	eukaryotic translation elongation factor 1 complex	14
	large ribosomal subunit	13
	mitochondrial proton-transporting ATP synthase complex, coupling factor F(o)	13
	mitochondrial respiratory chain complex IV	13
	postsynaptic membrane	13
	proton-transporting V-type ATPase, V1 domain	13
	small ribosomal subunit	13
	gap junction	12
	mitochondrial envelope	12
	transcription factor TFIIA complex	12
	actin cytoskeleton	11
	endoplasmic reticulum membrane	11
	membrane coat	11
	signal recognition particle	11
	mediator complex	10
	spliceosome	10
	chromatin	9
	peroxisome	9
	protein kinase CK2 complex	9
	proteasome activator complex	8
	signal peptidase complex	8
	transcription factor TFIID complex	8
	intracellular membrane-bounded organelle	7
	cullin-RING ubiquitin ligase complex	6
	Golgi membrane	6
	mitochondrial respiratory chain	6
	phosphopyruvate hydratase complex	6
	proteinaceous extracellular matrix	6
	proton-transporting ATP synthase complex, coupling factor F(o)	6
	small-subunit processome	6
	transcription factor complex	6
	COPI vesicle coat	5
	DNA-directed RNA polymerase II, core complex	5
	microtubule associated complex	5
	nuclear chromosome	5
	PCNA complex	5
	F-actin capping protein complex	4
	Golgi cisterna membrane	4
	mitochondrial matrix	4
	mitochondrial membrane	4
	myosin complex	4
	nuclear pore	4
	proton-transporting V-type ATPase, V0 domain	4
	anaphase-promoting complex	3
	chromosome	3
	eukaryotic translation initiation factor 3 complex	3
	Golgi apparatus	3
	integral to endoplasmic reticulum membrane	3
	mitochondrial intermembrane space	3
	mitochondrial outer membrane	3
	prefoldin complex	3
	proteasome complex	3
	retromer complex	3
	vacuolar proton-transporting V-type ATPase complex	3
	vacuolar proton-transporting V-type ATPase, V1 domain	3
	core TFIIH complex	2
	DNA replication factor C complex	2
	exocyst	2
	extrinsic to membrane	2
	glycerol-3-phosphate dehydrogenase complex	2
	glycine cleavage complex	2
	Golgi stack	2
	integrin complex	2
	kinesin complex	2
	mitochondrial intermembrane space protein transporter complex	2
	mitochondrial outer membrane translocase complex	2
	mitochondrial ribosome	2
	outer membrane-bounded periplasmic space	2
	proteasome regulatory particle	2
	ribonucleoprotein complex	2
	RNA polymerase complex	2
	secretory granule	2
	signal recognition particle, endoplasmic reticulum targeting	2
	transcription factor TFIIF complex	2
	translocon complex	2
	tRNA-intron endonuclease complex	2
	cis-Golgi network	1
	clathrin coat of trans-Golgi network vesicle	1
	cytoplasmic membrane-bounded vesicle	1
	dynactin complex	1
	dynein complex	1
	extracellular space	1
	gamma DNA polymerase complex	1
	Golgi-associated vesicle	1
	hemoglobin complex	1
	integral to Golgi membrane	1
	integral to mitochondrial inner membrane	1
	keratin filament	1
	lysosome	1
	microtubule organizing center	1
	mitochondrial inner membrane presequence translocase complex	1
	nuclear envelope	1
	phosphorylase kinase complex	1
	spindle pole	1
	synaptic vesicle	1
	vacuole	1
	vesicle membrane	1
	voltage-gated potassium channel complex	1
Cellular Component Total		3087
Molecular Function	ATP binding	558
	structural constituent of ribosome	527
	catalytic activity	429
	oxidoreductase activity	317
	protein binding	311
	binding	287
	zinc ion binding	287
	DNA binding	242
	serine-type endopeptidase inhibitor activity	230
	nucleic acid binding	204
	GTP binding	202
	calcium ion binding	169
	electron carrier activity	140
	heme binding	134
	RNA binding	124
	iron ion binding	123
	nucleotide binding	113
	aspartic-type endopeptidase activity	101
	sugar binding	99
	transcription factor activity	98
	pyridoxal phosphate binding	94
	cysteine-type peptidase activity	93
	metal ion binding	76
	protein kinase activity	76
	transporter activity	67
	cytochrome-c oxidase activity	62
	hydrolase activity	61
	structural molecule activity	60
	unfolded protein binding	60
	calcium-dependent phospholipid binding	57
	sequence-specific DNA binding	56
	actin binding	53
	peptidyl-prolyl cis-trans isomerase activity	52
	protein tyrosine phosphatase activity	51
	hydrogen ion transmembrane transporter activity	50
	aminoacyl-tRNA ligase activity	49
	DNA-directed RNA polymerase activity	47
	monooxygenase activity	46
	ATPase activity	45
	cysteine-type endopeptidase activity	45
	translation initiation factor activity	43
	ubiquinol-cytochrome-c reductase activity	43
	metalloendopeptidase activity	42
	transferase activity, transferring hexosyl groups	42
	protein serine/threonine kinase activity	41
	magnesium ion binding	40
	NAD or NADH binding	40
	GTPase activity	37
	small conjugating protein ligase activity	37
	ubiquitin thiolesterase activity	35
	hydrolase activity, acting on acid anhydrides, catalyzing transmembrane movement of substances	33
	proton-transporting ATPase activity, rotational mechanism	31
	serine-type endopeptidase activity	31
	transcription regulator activity	31
	heat shock protein binding	30
	oxidoreductase activity, acting on the CH-OH group of donors, NAD or NADP as acceptor	29
	FAD binding	28
	steroid hormone receptor activity	28
	acid-amino acid ligase activity	27
	iron-sulfur cluster binding	27
	glutathione peroxidase activity	25
	helicase activity	25
	methyltransferase activity	25
	NADH dehydrogenase (ubiquinone) activity	25
	RNA polymerase II transcription factor activity	25
	translation elongation factor activity	25
	lipid binding	24
	phosphotransferase activity, alcohol group as acceptor	24
	protein tyrosine kinase activity	24
	transaminase activity	24
	hydrogen ion transporting ATP synthase activity, rotational mechanism	23
	kinase activity	22
	phosphatase activity	22
	2 iron, 2 sulfur cluster binding	21
	phosphorus-oxygen lyase activity	21
	acyl-CoA binding	20
	rRNA binding	20
	transferase activity, transferring phosphorus-containing groups	20
	acyltransferase activity	19
	cation transmembrane transporter activity	19
	N-acetyltransferase activity	18
	oxygen binding	18
	pyrophosphatase activity	18
	hydrolase activity, hydrolyzing O-glycosyl compounds	17
	nucleobase, nucleoside, nucleotide kinase activity	17
	nucleoside diphosphate kinase activity	17
	peptidase activity	17
	protein dimerization activity	17
	transferase activity	17
	extracellular ligand-gated ion channel activity	16
	carbon-nitrogen ligase activity, with glutamine as amido-N-donor	15
	metallopeptidase activity	15
	signal transducer activity	15
	threonine-type endopeptidase activity	15
	lipid transporter activity	14
	peroxidase activity	14
	7S RNA binding	13
	copper ion binding	13
	protein disulfide oxidoreductase activity	13
	ribosome binding	13
	thiol oxidase activity	13
	cation binding	12
	cysteine-type endopeptidase inhibitor activity	12
	NADH dehydrogenase activity	12
	nucleoside-triphosphatase activity	12
	serine-type peptidase activity	12
	calcium-dependent cysteine-type endopeptidase activity	11
	coenzyme binding	11
	alpha,alpha-trehalase activity	10
	copper ion transmembrane transporter activity	10
	dioxygenase activity	10
	methionine adenosyltransferase activity	10
	neurotransmitter receptor activity	10
	oxidoreductase activity, acting on NADH or NADPH	10
	phosphoric ester hydrolase activity	10
	receptor binding	10
	RNA polymerase II transcription mediator activity	10
	triacylglycerol lipase activity	10
	acyl carrier activity	9
	catalase activity	9
	chromatin binding	9
	glutathione synthase activity	9
	isomerase activity	9
	potassium ion binding	9
	P-P-bond-hydrolysis-driven protein transmembrane transporter activity	9
	protein kinase regulator activity	9
	pyruvate kinase activity	9
	4 iron, 4 sulfur cluster binding	8
	4-alpha-hydroxytetrahydrobiopterin dehydratase activity	8
	cobalamin binding	8
	cofactor binding	8
	hydrolase activity, acting on acid anhydrides, in phosphorus-containing anhydrides	8
	hydrolase activity, acting on ester bonds	8
	ligase activity	8
	nucleotidyltransferase activity	8
	oxidoreductase activity, acting on the CH-CH group of donors	8
	proteasome activator activity	8
	protein transporter activity	8
	Rab GTPase activator activity	8
	sodium channel activity	8
	transferase activity, transferring acyl groups other than amino-acyl groups	8
	acid phosphatase activity	7
	ATPase activity, coupled to transmembrane movement of ions, phosphorylative mechanism	7
	carbohydrate binding	7
	cob(I)yrinic acid a,c-diamide adenosyltransferase activity	7
	glyceraldehyde-3-phosphate dehydrogenase (phosphorylating) activity	7
	glycogen (starch) synthase activity	7
	GTPase activator activity	7
	guanyl nucleotide binding	7
	hedgehog receptor activity	7
	hydrolase activity, acting on carbon-nitrogen (but not peptide) bonds	7
	inositol or phosphatidylinositol phosphatase activity	7
	molybdenum ion binding	7
	NAD+ ADP-ribosyltransferase activity	7
	phosphoenolpyruvate carboxykinase activity	7
	phosphoinositide binding	7
	protein domain specific binding	7
	protein-L-isoaspartate (D-aspartate) O-methyltransferase activity	7
	serine-type carboxypeptidase activity	7
	sterol carrier activity	7
	sugar	7
	superoxide dismutase activity	7
	transferase activity, transferring nitrogenous groups	7
	5-formyltetrahydrofolate cyclo-ligase activity	6
	adenosine deaminase activity	6
	adenosylhomocysteinase activity	6
	ATPase activity, coupled to transmembrane movement of substances	6
	ATP-dependent helicase activity	6
	cation channel activity	6
	damaged DNA binding	6
	deaminase activity	6
	ER retention sequence binding	6
	ferric iron binding	6
	galactosyltransferase activity	6
	homogentisate 1,2-dioxygenase activity	6
	hydrolase activity, acting on carbon-nitrogen (but not peptide) bonds, in linear amidines	6
	hydroxymethyl-, formyl- and related transferase activity	6
	inorganic phosphate transmembrane transporter activity	6
	inositol trisphosphate 3-kinase activity	6
	inositol-3-phosphate synthase activity	6
	malate dehydrogenase activity	6
	microtubule motor activity	6
	motor activity	6
	oxidoreductase activity, acting on sulfur group of donors, disulfide as acceptor	6
	phosphopyruvate hydratase activity	6
	transferase activity, transferring acyl groups, acyl groups converted into alkyl on transfer	6
	ubiquitin protein ligase binding	6
	3'-5'-exoribonuclease activity	5
	6-pyruvoyltetrahydropterin synthase activity	5
	adenosylmethionine decarboxylase activity	5
	amino acid transmembrane transporter activity	5
	aminopeptidase activity	5
	chitin binding	5
	DNA polymerase processivity factor activity	5
	endonuclease activity	5
	FMN binding	5
	glucose-6-phosphate isomerase activity	5
	GTP cyclohydrolase I activity	5
	homocysteine S-methyltransferase activity	5
	inorganic diphosphatase activity	5
	nuclease activity	5
	oxidoreductase activity, acting on paired donors, with incorporation or reduction of molecular oxygen, reduced pteridine as one donor, and incorporation of one atom of oxygen	5
	phosphoglycerate kinase activity	5
	phosphorylase activity	5
	queuine tRNA-ribosyltransferase activity	5
	quinone binding	5
	receptor activity	5
	ribonucleoside-diphosphate reductase activity	5
	transition metal ion binding	5
	triose-phosphate isomerase activity	5
	3',5'-cyclic-nucleotide phosphodiesterase activity	4
	acetylglucosaminyltransferase activity	4
	acyl-CoA oxidase activity	4
	adenylosuccinate synthase activity	4
	ammonium transmembrane transporter activity	4
	ATP-dependent peptidase activity	4
	deoxyribonuclease II activity	4
	DNA-directed DNA polymerase activity	4
	dolichyl-diphosphooligosaccharide-protein glycotransferase activity	4
	fucosyltransferase activity	4
	gamma-glutamyltransferase activity	4
	glycerophosphodiester phosphodiesterase activity	4
	G-protein coupled receptor activity	4
	hydrolase activity, acting on carbon-nitrogen (but not peptide) bonds, in linear amides	4
	inositol or phosphatidylinositol kinase activity	4
	kynureninase activity	4
	metalloendopeptidase inhibitor activity	4
	methionine synthase activity	4
	N-acetylmuramoyl-L-alanine amidase activity	4
	NADP or NADPH binding	4
	O-methyltransferase activity	4
	oxidoreductase activity, acting on diphenols and related substances as donors	4
	phosphatidylcholine-sterol O-acyltransferase activity	4
	phosphoprotein phosphatase activity	4
	phosphoric diester hydrolase activity	4
	proline-tRNA ligase activity	4
	protein prenyltransferase activity	4
	protein tyrosine/serine/threonine phosphatase activity	4
	pseudouridine synthase activity	4
	ribonuclease H activity	4
	ribose-5-phosphate isomerase activity	4
	sodium	4
	transcription coactivator activity	4
	tRNA binding	4
	4-hydroxyphenylpyruvate dioxygenase activity	3
	5'-nucleotidase activity	3
	adenylate kinase activity	3
	aldehyde dehydrogenase [NAD(P)+] activity	3
	aminomethyltransferase activity	3
	antioxidant activity	3
	biotin binding	3
	biotin-[acetyl-CoA-carboxylase] ligase activity	3
	calmodulin binding	3
	carbonate dehydratase activity	3
	carboxy-lyase activity	3
	copper chaperone activity	3
	dihydrofolate reductase activity	3
	dipeptidyl-peptidase activity	3
	DNA helicase activity	3
	double-stranded RNA binding	3
	enzyme inhibitor activity	3
	enzyme regulator activity	3
	glutamine-tRNA ligase activity	3
	glycerol kinase activity	3
	glycine dehydrogenase (decarboxylating) activity	3
	inorganic anion exchanger activity	3
	intramolecular transferase activity	3
	isocitrate dehydrogenase (NADP+) activity	3
	lipoate synthase activity	3
	lyase activity	3
	lysozyme activity	3
	metal ion transmembrane transporter activity	3
	NAD binding	3
	nucleoside transmembrane transporter activity	3
	phenylalanine-tRNA ligase activity	3
	prenyltransferase activity	3
	Rho GDP-dissociation inhibitor activity	3
	ribulose-phosphate 3-epimerase activity	3
	single-stranded DNA binding	3
	small GTPase regulator activity	3
	succinate dehydrogenase activity	3
	thymidine kinase activity	3
	transferase activity, transferring glycosyl groups	3
	tRNA (guanine-N7-)-methyltransferase activity	3
	tRNA dihydrouridine synthase activity	3
	tropomyosin binding	3
	urocanate hydratase activity	3
	1-alkyl-2-acetylglycerophosphocholine esterase activity	2
	4-aminobutyrate transaminase activity	2
	acyl-CoA thioesterase activity	2
	adenyl-nucleotide exchange factor activity	2
	alpha-1,6-mannosylglycoprotein 2-beta-N-acetylglucosaminyltransferase activity	2
	amino acid binding	2
	ammonia ligase activity	2
	amylo-alpha-1,6-glucosidase activity	2
	anion exchanger activity	2
	asparagine synthase (glutamine-hydrolyzing) activity	2
	ATP citrate synthase activity	2
	ATP-dependent DNA helicase activity	2
	calmodulin-dependent protein kinase activity	2
	cAMP-dependent protein kinase inhibitor activity	2
	carbon-carbon lyase activity	2
	chaperone binding	2
	cyclin-dependent protein kinase inhibitor activity	2
	cytidine deaminase activity	2
	cytoskeletal protein binding	2
	diacylglycerol kinase activity	2
	DNA clamp loader activity	2
	dopamine beta-monooxygenase activity	2
	endodeoxyribonuclease activity, producing 5'-phosphomonoesters	2
	endopeptidase activity	2
	endoplasmic reticulum signal peptide binding	2
	exonuclease activity	2
	flavin-containing monooxygenase activity	2
	folic acid binding	2
	fructose-bisphosphate aldolase activity	2
	galactosylgalactosylxylosylprotein 3-beta-glucuronosyltransferase activity	2
	GDP-mannose 4,6-dehydratase activity	2
	general RNA polymerase II transcription factor activity	2
	glucose-6-phosphate dehydrogenase activity	2
	glycerol-3-phosphate dehydrogenase (NAD+) activity	2
	glycine hydroxymethyltransferase activity	2
	glycolipid binding	2
	glycolipid transporter activity	2
	growth factor activity	2
	guanyl-nucleotide exchange factor activity	2
	histidine-tRNA ligase activity	2
	holo-[acyl-carrier-protein] synthase activity	2
	holocytochrome-c synthase activity	2
	hydrogen-exporting ATPase activity, phosphorylative mechanism	2
	kinesin binding	2
	lactoylglutathione lyase activity	2
	L-malate dehydrogenase activity	2
	mannosidase activity	2
	metalloexopeptidase activity	2
	methylmalonate-semialdehyde dehydrogenase (acylating) activity	2
	microtubule binding	2
	non-G-protein coupled 7TM receptor activity	2
	nucleotide kinase activity	2
	oxidoreductase activity, acting on the aldehyde or oxo group of donors, disulfide as acceptor	2
	oxidoreductase activity, acting on the CH-NH2 group of donors	2
	oxoglutarate dehydrogenase (succinyl-transferring) activity	2
	pantothenate kinase activity	2
	peptide-methionine-(S)-S-oxide reductase activity	2
	phosphoinositide phospholipase C activity	2
	phospholipase A2 activity	2
	phosphomannomutase activity	2
	phosphotransferase activity, phosphate group as acceptor	2
	protein homodimerization activity	2
	protein kinase C activity	2
	purine nucleotide binding	2
	reduced folate carrier activity	2
	ribonucleoside binding	2
	strictosidine synthase activity	2
	structural constituent of cuticle	2
	succinate-CoA ligase (ADP-forming) activity	2
	sulfotransferase activity	2
	syntaxin binding	2
	thiamin pyrophosphate binding	2
	transferase activity, transferring pentosyl groups	2
	transmembrane receptor activity	2
	tRNA-intron endonuclease activity	2
	tryptophan 2,3-dioxygenase activity	2
	UDP-glucose	2
	UDP-glucose 4-epimerase activity	2
	uridine phosphorylase activity	2
	valine-tRNA ligase activity	2
	voltage-gated chloride channel activity	2
	5S rRNA binding	1
	6-phosphofructo-2-kinase activity	1
	6-phosphogluconolactonase activity	1
	acireductone synthase activity	1
	aconitate hydratase activity	1
	acyl-CoA dehydrogenase activity	1
	alpha-L-fucosidase activity	1
	aminoacyl-tRNA hydrolase activity	1
	anion transmembrane transporter activity	1
	arginase activity	1
	arginyltransferase activity	1
	branched-chain-amino-acid transaminase activity	1
	C-8 sterol isomerase activity	1
	carboxyl- or carbamoyltransferase activity	1
	carboxylesterase activity	1
	carboxypeptidase activity	1
	cysteamine dioxygenase activity	1
	cysteine-tRNA ligase activity	1
	deoxyribose-phosphate aldolase activity	1
	dihydrolipoyl dehydrogenase activity	1
	dihydrolipoyllysine-residue (2-methylpropanoyl)transferase activity	1
	dihydroorotate dehydrogenase activity	1
	diphosphomevalonate decarboxylase activity	1
	DNA topoisomerase (ATP-hydrolyzing) activity	1
	dUTP diphosphatase activity	1
	electron-transferring-flavoprotein dehydrogenase activity	1
	formate-tetrahydrofolate ligase activity	1
	glucosylceramidase activity	1
	glutamate-ammonia ligase activity	1
	glutamate-cysteine ligase activity	1
	glutathione gamma-glutamylcysteinyltransferase activity	1
	glutathione transferase activity	1
	glycine C-acetyltransferase activity	1
	glycine-tRNA ligase activity	1
	histone deacetylase activity	1
	hormone activity	1
	hydrolase activity, acting on carbon-nitrogen (but not peptide) bonds, in cyclic amides	1
	IMP cyclohydrolase activity	1
	intramolecular transferase activity, phosphotransferases	1
	ion channel activity	1
	L-ascorbic acid binding	1
	L-lactate dehydrogenase activity	1
	lysine-tRNA ligase activity	1
	malate synthase activity	1
	metallocarboxypeptidase activity	1
	mismatched DNA binding	1
	NAD(P) transhydrogenase activity	1
	non-membrane spanning protein tyrosine kinase activity	1
	oligosaccharyl transferase activity	1
	ornithine decarboxylase inhibitor activity	1
	oxidoreductase activity, acting on CH-OH group of donors	1
	peptide-aspartate beta-dioxygenase activity	1
	phosphatidylinositol N-acetylglucosaminyltransferase activity	1
	phosphatidylinositol phosphate kinase activity	1
	phosphogluconate dehydrogenase (decarboxylating) activity	1
	phosphoglycerate dehydrogenase activity	1
	phosphoglycolate phosphatase activity	1
	phosphoprotein phosphatase inhibitor activity	1
	phosphoribosylaminoimidazolecarboxamide formyltransferase activity	1
	phosphoribosylaminoimidazolesuccinocarboxamide synthase activity	1
	phosphorylase kinase activity	1
	polyribonucleotide nucleotidyltransferase activity	1
	procollagen-lysine 5-dioxygenase activity	1
	protein histidine kinase activity	1
	purine-nucleoside phosphorylase activity	1
	pyridoxamine-phosphate oxidase activity	1
	pyrroline-5-carboxylate reductase activity	1
	racemase and epimerase activity, acting on carbohydrates and derivatives	1
	riboflavin kinase activity	1
	ribonuclease activity	1
	ribonuclease T2 activity	1
	RNA methyltransferase activity	1
	selenium binding	1
	S-formylglutathione hydrolase activity	1
	SNAP receptor activity	1
	solute	1
	structural constituent of nuclear pore	1
	transaldolase activity	1
	translation release factor activity	1
	trimethyllysine dioxygenase activity	1
	tRNA (5-methylaminomethyl-2-thiouridylate)-methyltransferase activity	1
	tRNA (adenine-N1-)-methyltransferase activity	1
	tRNA (guanine-N2-)-methyltransferase activity	1
	tryptophan-tRNA ligase activity	1
	two-component sensor activity	1
	ubiquitin-protein ligase activity	1
	voltage-gated anion channel activity	1
	voltage-gated potassium channel activity	1
Molecular Function Total		8671

## Sheet: A. caninum
GO category	GO description (Ancylostoma caninum)	No. of ESTs
Biological Process	metabolic process	284
	proteolysis	254
	protein amino acid phosphorylation	159
	translation	146
	transport	114
	carbohydrate metabolic process	100
	oxidation reduction	85
	regulation of transcription, DNA-dependent	53
	intracellular protein transport	52
	protein folding	48
	protein amino acid dephosphorylation	45
	signal transduction	43
	protein transport	40
	tRNA aminoacylation for protein translation	40
	vesicle-mediated transport	39
	small GTPase mediated signal transduction	38
	ATP synthesis coupled proton transport	34
	DNA replication	34
	glycolysis	34
	lipid metabolic process	34
	regulation of transcription	31
	ubiquitin-dependent protein catabolic process	30
	protein modification process	28
	cell redox homeostasis	26
	dephosphorylation	25
	cation transport	24
	transcription	24
	ion transport	23
	nucleosome assembly	21
	microtubule-based movement	19
	RNA processing	19
	translational elongation	19
	DNA metabolic process	18
	nucleobase, nucleoside, nucleotide and nucleic acid metabolic process	18
	cellular protein metabolic process	17
	DNA repair	17
	translational initiation	17
	cell adhesion	16
	microtubule-based process	16
	response to stress	16
	amino acid metabolic process	15
	ATP biosynthetic process	15
	biosynthetic process	15
	post-translational protein modification	15
	protein polymerization	15
	proteolysis involved in cellular protein catabolic process	15
	regulation of protein metabolic process	15
	gluconeogenesis	14
	G-protein coupled receptor protein signaling pathway	14
	intracellular signaling cascade	14
	protein amino acid glycosylation	14
	rRNA processing	13
	cellular process	12
	cellular metabolic process	11
	multicellular organismal development	11
	DNA recombination	10
	glucose metabolic process	10
	metal ion transport	10
	nitrogen compound metabolic process	10
	regulation of transcription from RNA polymerase II promoter	10
	tRNA processing	10
	amino acid transport	9
	glycogen biosynthetic process	9
	response to oxidative stress	9
	tricarboxylic acid cycle	9
	fatty acid metabolic process	8
	lipid catabolic process	8
	mismatch repair	8
	pentose-phosphate shunt	8
	trehalose metabolic process	8
	Wnt receptor signaling pathway, calcium modulating pathway	8
	cellular carbohydrate metabolic process	7
	methylation	7
	nucleocytoplasmic transport	7
	nucleoside metabolic process	7
	phospholipid metabolic process	7
	purine nucleotide biosynthetic process	7
	RNA-dependent DNA replication	7
	sodium ion transport	7
	vesicle docking during exocytosis	7
	arginyl-tRNA aminoacylation	6
	glycerol-3-phosphate metabolic process	6
	glycine metabolic process	6
	phospholipid biosynthetic process	6
	regulation of actin filament polymerization	6
	regulation of Rab GTPase activity	6
	actin cytoskeleton organization	5
	cell cycle	5
	folic acid and derivative biosynthetic process	5
	glycerol metabolic process	5
	histidine catabolic process	5
	mitosis	5
	nucleotide-excision repair	5
	oxygen transport	5
	purine ribonucleoside monophosphate biosynthetic process	5
	ribosome biogenesis	5
	SRP-dependent cotranslational protein targeting to membrane	5
	superoxide metabolic process	5
	transcription initiation	5
	acetyl-CoA metabolic process	4
	carboxylic acid metabolic process	4
	cell communication	4
	chitin metabolic process	4
	chloride transport	4
	chromatin assembly or disassembly	4
	chromatin remodeling	4
	cytoskeleton organization	4
	DNA topological change	4
	glutamine metabolic process	4
	glutaminyl-tRNA aminoacylation	4
	glycerol-3-phosphate catabolic process	4
	glycine catabolic process	4
	GPI anchor biosynthetic process	4
	L-serine metabolic process	4
	lysyl-tRNA aminoacylation	4
	malate metabolic process	4
	mRNA processing	4
	phosphoinositide phosphorylation	4
	phosphoinositide-mediated signaling	4
	protein processing	4
	pseudouridine synthesis	4
	RNA modification	4
	RNA splicing	4
	steroid metabolic process	4
	sulfate assimilation	4
	transcription initiation from RNA polymerase II promoter	4
	activation of protein kinase C activity by G-protein coupled receptor protein signaling pathway	3
	anion transport	3
	ATP metabolic process	3
	autophagy	3
	branched chain family amino acid metabolic process	3
	cellular aldehyde metabolic process	3
	cellular iron ion homeostasis	3
	chromatin silencing	3
	dicarboxylic acid transport	3
	D-xylose metabolic process	3
	exocytosis	3
	GDP-mannose metabolic process	3
	glycyl-tRNA aminoacylation	3
	histone deacetylation	3
	inositol biosynthetic process	3
	intracellular transport	3
	iron ion transport	3
	isocitrate metabolic process	3
	monovalent inorganic cation transport	3
	neuropeptide signaling pathway	3
	nuclear mRNA splicing, via spliceosome	3
	one-carbon compound metabolic process	3
	phenylalanyl-tRNA aminoacylation	3
	phosphate metabolic process	3
	protein amino acid deacetylation	3
	protein amino acid N-linked glycosylation via asparagine	3
	protein catabolic process	3
	protein retention in ER lumen	3
	purine ribonucleoside salvage	3
	regulation of Rho protein signal transduction	3
	regulation of signal transduction	3
	rRNA methylation	3
	sphingolipid metabolic process	3
	tRNA aminoacylation	3
	tryptophanyl-tRNA aminoacylation	3
	acyl-CoA biosynthetic process	2
	acyl-CoA metabolic process	2
	alanyl-tRNA aminoacylation	2
	apoptosis	2
	asparagine biosynthetic process	2
	ATP synthesis coupled electron transport	2
	ATP-dependent chromatin remodeling	2
	base-excision repair	2
	carbohydrate transport	2
	carnitine biosynthetic process	2
	catecholamine metabolic process	2
	cell cycle arrest	2
	cell differentiation	2
	cell-matrix adhesion	2
	coenzyme A metabolic process	2
	copper ion transport	2
	cysteinyl-tRNA aminoacylation	2
	'de novo' IMP biosynthetic process	2
	defense response	2
	deoxyribonucleoside diphosphate metabolic process	2
	deoxyribonucleotide catabolic process	2
	DNA integration	2
	DNA replication initiation	2
	DNA replication, synthesis of RNA primer	2
	DNA unwinding during replication	2
	double-strand break repair via nonhomologous end joining	2
	galactose metabolic process	2
	gamma-aminobutyric acid metabolic process	2
	glutamate biosynthetic process	2
	histidyl-tRNA aminoacylation	2
	homophilic cell adhesion	2
	integrin-mediated signaling pathway	2
	isoprenoid biosynthetic process	2
	lipoate biosynthetic process	2
	L-serine biosynthetic process	2
	lysosome organization	2
	neurotransmitter transport	2
	N-terminal protein myristoylation	2
	oligopeptide transport	2
	peptidyl-lysine modification to hypusine	2
	phosphorylation	2
	positive regulation of catalytic activity	2
	positive regulation of translational elongation	2
	positive regulation of translational termination	2
	potassium ion transport	2
	proline catabolic process	2
	protein arginylation	2
	protein insertion into membrane	2
	protein targeting	2
	protein thiol-disulfide exchange	2
	protein ubiquitination	2
	proton transport	2
	pyrimidine nucleotide biosynthetic process	2
	regulation of apoptosis	2
	regulation of protein catabolic process	2
	regulation of small GTPase mediated signal transduction	2
	regulation of transcription factor activity	2
	response to biotic stimulus	2
	RNA metabolic process	2
	signal peptide processing	2
	translational frameshifting	2
	tRNA methylation	2
	ubiquinone biosynthetic process	2
	UMP biosynthetic process	2
	valyl-tRNA aminoacylation	2
	anaerobic glycolysis	1
	arginine metabolic process	1
	aromatic amino acid family metabolic process	1
	aspartyl-tRNA aminoacylation	1
	autophagic vacuole formation	1
	calcium ion transport	1
	calcium-mediated signaling	1
	cAMP biosynthetic process	1
	carbohydrate phosphorylation	1
	carbon utilization	1
	cell proliferation	1
	cell surface receptor linked signal transduction	1
	cellular metal ion homeostasis	1
	chitin catabolic process	1
	chromatin modification	1
	coenzyme A biosynthetic process	1
	cotranslational protein targeting to membrane	1
	CTP biosynthetic process	1
	cyanate metabolic process	1
	cyclic nucleotide biosynthetic process	1
	cysteine biosynthetic process from serine	1
	'de novo' pyrimidine base biosynthetic process	1
	dTMP biosynthetic process	1
	dUTP metabolic process	1
	ER to Golgi vesicle-mediated transport	1
	ergosterol biosynthetic process	1
	ethanol oxidation	1
	fatty acid beta-oxidation	1
	filopodium assembly	1
	fructose 2,6-bisphosphate metabolic process	1
	glucose catabolic process	1
	glutamine biosynthetic process	1
	glutathione biosynthetic process	1
	glycolipid transport	1
	glyoxylate cycle	1
	GTP biosynthetic process	1
	IMP biosynthetic process	1
	intein-mediated protein splicing	1
	intra-Golgi vesicle-mediated transport	1
	lipid glycosylation	1
	macromolecule biosynthetic process	1
	mannose metabolic process	1
	mature ribosome assembly	1
	methionine biosynthetic process	1
	mitochondrial electron transport, ubiquinol to cytochrome c	1
	molybdopterin cofactor biosynthetic process	1
	mRNA capping	1
	NAD biosynthetic process	1
	negative regulation of nucleotide metabolic process	1
	negative regulation of translational elongation	1
	nitrogen fixation	1
	nucleotide catabolic process	1
	oligosaccharide metabolic process	1
	pentose-phosphate shunt, non-oxidative branch	1
	peptidyl-histidine phosphorylation	1
	peroxisome organization	1
	phagocytosis	1
	phosphate transport	1
	phosphatidylinositol metabolic process	1
	phosphoenolpyruvate-dependent sugar phosphotransferase system	1
	positive regulation of transcription	1
	proline biosynthetic process	1
	prolyl-tRNA aminoacylation	1
	proteasomal ubiquitin-dependent protein catabolic process	1
	protein amino acid N-linked glycosylation	1
	protein amino acid prenylation	1
	protein complex assembly	1
	protein-DNA covalent cross-linking	1
	proton-transporting ATP synthase complex assembly	1
	purine base biosynthetic process	1
	pyridine nucleotide biosynthetic process	1
	pyridoxine biosynthetic process	1
	regulation of catalytic activity	1
	regulation of DNA replication	1
	regulation of GTPase activity	1
	regulation of mitotic metaphase/anaphase transition	1
	regulation of pH	1
	regulation of phosphoprotein phosphatase activity	1
	retrograde transport, endosome to Golgi	1
	retrograde vesicle-mediated transport, Golgi to ER	1
	RNA capping	1
	RNA methylation	1
	rRNA modification	1
	spermidine biosynthetic process	1
	spermine biosynthetic process	1
	spliceosome assembly	1
	steroid biosynthetic process	1
	sulfate transport	1
	tetrahydrofolate biosynthetic process	1
	thiamin diphosphate biosynthetic process	1
	translational termination	1
	tRNA splicing, via endonucleolytic cleavage and ligation	1
	tryptophan catabolic process	1
	tryptophan metabolic process	1
	UTP biosynthetic process	1
	vesicle docking	1
	vesicle fusion with Golgi apparatus	1
Biological Process Total		3056
Cellular Component	intracellular	287
	membrane	251
	nucleus	174
	extracellular region	156
	integral to membrane	143
	cytoplasm	122
	ribosome	88
	endoplasmic reticulum	35
	myosin complex	21
	proton-transporting two-sector ATPase complex, catalytic domain	19
	nucleosome	18
	postsynaptic membrane	16
	microtubule	15
	proteasome core complex	15
	protein complex	15
	cytoskeleton	14
	endoplasmic reticulum membrane	10
	gap junction	10
	mediator complex	10
	clathrin adaptor complex	9
	membrane coat	9
	proton-transporting ATP synthase complex, catalytic core F(1)	9
	eukaryotic translation elongation factor 1 complex	8
	proton-transporting two-sector ATPase complex, proton-transporting domain	8
	small ribosomal subunit	8
	COPI vesicle coat	7
	mitochondrial inner membrane	7
	phosphopyruvate hydratase complex	7
	6-phosphofructokinase complex	6
	actin cytoskeleton	6
	chromosome	6
	large ribosomal subunit	6
	nuclear pore	6
	proteinaceous extracellular matrix	6
	spliceosome	6
	cullin-RING ubiquitin ligase complex	5
	DNA replication factor C complex	5
	glycerol-3-phosphate dehydrogenase complex	5
	mitochondrion	5
	ribonucleoprotein complex	5
	signal recognition particle	5
	small-subunit processome	5
	F-actin capping protein complex	4
	Golgi membrane	4
	nuclear chromosome	4
	ribonucleoside-diphosphate reductase complex	4
	transcription factor TFIID complex	4
	chromatin	3
	cis-Golgi network	3
	clathrin coat of trans-Golgi network vesicle	3
	collagen	3
	Golgi-associated vesicle	3
	peroxisome	3
	proteasome regulatory particle	3
	protein serine/threonine phosphatase complex	3
	proton-transporting V-type ATPase, V1 domain	3
	chromatin remodeling complex	2
	chromosome, centromeric region	2
	clathrin coat of coated pit	2
	dynein complex	2
	exocyst	2
	gamma DNA polymerase complex	2
	Golgi apparatus	2
	GPI-anchor transamidase complex	2
	integral to mitochondrial inner membrane	2
	integrin complex	2
	intracellular membrane-bounded organelle	2
	lysosome	2
	mitochondrial envelope	2
	mitochondrial matrix	2
	mitochondrial outer membrane	2
	mitochondrial outer membrane translocase complex	2
	origin recognition complex	2
	phosphoinositide 3-kinase complex	2
	prefoldin complex	2
	proteasome complex	2
	protein kinase CK2 complex	2
	protein phosphatase type 2A complex	2
	proton-transporting two-sector ATPase complex	2
	transcription factor complex	2
	vacuole	2
	anaphase-promoting complex	1
	cell outer membrane	1
	COPII vesicle coat	1
	core TFIIH complex	1
	cytoplasmic membrane-bounded vesicle	1
	dynactin complex	1
	eukaryotic translation initiation factor 2 complex	1
	extracellular matrix	1
	extracellular space	1
	extrinsic to membrane	1
	Golgi cisterna membrane	1
	integral to endoplasmic reticulum membrane	1
	integral to Golgi membrane	1
	integral to nuclear inner membrane	1
	integral to plasma membrane	1
	intrinsic to endoplasmic reticulum membrane	1
	kinesin complex	1
	mitochondrial inner membrane presequence translocase complex	1
	mitochondrial proton-transporting ATP synthase complex, coupling factor F(o)	1
	mitochondrial respiratory chain complex IV	1
	nucleolus	1
	oligosaccharyltransferase complex	1
	outer membrane	1
	PCNA complex	1
	peroxisomal membrane	1
	phosphorylase kinase complex	1
	preribosome, small subunit precursor	1
	proton-transporting V-type ATPase, V0 domain	1
	secretory granule	1
	signal peptidase complex	1
	small nucleolar ribonucleoprotein complex	1
	synaptic vesicle	1
	transcription factor TFIIF complex	1
	translocon complex	1
	tRNA-intron endonuclease complex	1
	ubiquitin ligase complex	1
	vacuolar proton-transporting V-type ATPase, V1 domain	1
	voltage-gated potassium channel complex	1
Cellular Component Total		1703
Molecular Function	ATP binding	514
	catalytic activity	346
	binding	237
	zinc ion binding	214
	protein binding	212
	nucleic acid binding	192
	oxidoreductase activity	185
	protein kinase activity	146
	nucleotide binding	138
	DNA binding	121
	GTP binding	95
	protein serine/threonine kinase activity	95
	structural constituent of ribosome	91
	RNA binding	90
	calcium ion binding	79
	metalloendopeptidase activity	75
	protein tyrosine kinase activity	70
	structural molecule activity	65
	hydrolase activity	60
	electron carrier activity	59
	cysteine-type peptidase activity	51
	transcription factor activity	47
	cysteine-type endopeptidase activity	46
	metallopeptidase activity	46
	aminoacyl-tRNA ligase activity	45
	pyridoxal phosphate binding	44
	transporter activity	44
	unfolded protein binding	41
	protein tyrosine phosphatase activity	38
	metal ion binding	34
	NAD or NADH binding	33
	helicase activity	30
	oxidoreductase activity, acting on the CH-OH group of donors, NAD or NADP as acceptor	30
	magnesium ion binding	28
	phosphatase activity	28
	aspartic-type endopeptidase activity	27
	ATPase activity	27
	phosphotransferase activity, alcohol group as acceptor	27
	FAD binding	26
	GTPase activity	26
	serine-type endopeptidase activity	25
	serine-type endopeptidase inhibitor activity	25
	actin binding	24
	lipid binding	24
	transferase activity, transferring hexosyl groups	24
	ATP-dependent helicase activity	23
	motor activity	22
	signal transducer activity	21
	cation binding	20
	methyltransferase activity	20
	steroid hormone receptor activity	20
	coenzyme binding	19
	hydrolase activity, acting on acid anhydrides, catalyzing transmembrane movement of substances	19
	sequence-specific DNA binding	19
	ubiquitin thiolesterase activity	19
	DNA-directed RNA polymerase activity	18
	iron ion binding	18
	sugar binding	18
	translation elongation factor activity	18
	translation initiation factor activity	18
	extracellular ligand-gated ion channel activity	17
	heme binding	17
	hydrolase activity, hydrolyzing O-glycosyl compounds	17
	nucleoside-triphosphatase activity	17
	transcription regulator activity	17
	acyltransferase activity	16
	structural constituent of cuticle	16
	acid-amino acid ligase activity	15
	ATPase activity, coupled to transmembrane movement of ions, phosphorylative mechanism	15
	small conjugating protein ligase activity	15
	threonine-type endopeptidase activity	15
	peptidyl-prolyl cis-trans isomerase activity	13
	phosphoenolpyruvate carboxykinase activity	13
	serine-type peptidase activity	13
	cation transmembrane transporter activity	12
	deoxyribonuclease II activity	12
	proton-transporting ATPase activity, rotational mechanism	12
	triacylglycerol lipase activity	12
	aminopeptidase activity	11
	iron-sulfur cluster binding	11
	oxidoreductase activity, acting on the CH-CH group of donors	11
	protein dimerization activity	11
	purine nucleotide binding	11
	DNA-directed DNA polymerase activity	10
	hedgehog receptor activity	10
	hydrogen ion transporting ATP synthase activity, rotational mechanism	10
	hydrolase activity, acting on carbon-nitrogen (but not peptide) bonds	10
	mannosyl-oligosaccharide 1,2-alpha-mannosidase activity	10
	NADH dehydrogenase (ubiquinone) activity	10
	RNA polymerase II transcription mediator activity	10
	transferase activity	10
	amino acid transmembrane transporter activity	9
	heat shock protein binding	9
	hydrogen ion transmembrane transporter activity	9
	hydrolase activity, acting on acid anhydrides, in phosphorus-containing anhydrides	9
	neurotransmitter receptor activity	9
	protein tyrosine/serine/threonine phosphatase activity	9
	alpha,alpha-trehalase activity	8
	ATPase activity, coupled to transmembrane movement of substances	8
	glyceraldehyde-3-phosphate dehydrogenase (phosphorylating) activity	8
	glycogen (starch) synthase activity	8
	guanyl-nucleotide exchange factor activity	8
	ion channel activity	8
	metal ion transmembrane transporter activity	8
	mismatched DNA binding	8
	nucleobase, nucleoside, nucleotide kinase activity	8
	oxidoreductase activity, acting on NADH or NADPH	8
	ribonuclease activity	8
	RNA polymerase II transcription factor activity	8
	transferase activity, transferring glycosyl groups	8
	acid phosphatase activity	7
	acyl-CoA dehydrogenase activity	7
	double-stranded RNA binding	7
	hyalurononglucosaminidase activity	7
	hydrolase activity, acting on ester bonds	7
	metallocarboxypeptidase activity	7
	microtubule motor activity	7
	monooxygenase activity	7
	phospholipase A2 activity	7
	phosphopyruvate hydratase activity	7
	protein disulfide oxidoreductase activity	7
	pyrophosphatase activity	7
	RNA-directed DNA polymerase activity	7
	transaminase activity	7
	transferase activity, transferring nitrogenous groups	7
	2 iron, 2 sulfur cluster binding	6
	6-phosphofructokinase activity	6
	arginine-tRNA ligase activity	6
	calcium-dependent cysteine-type endopeptidase activity	6
	calcium-dependent phospholipid binding	6
	carbon-nitrogen ligase activity, with glutamine as amido-N-donor	6
	dolichyl-diphosphooligosaccharide-protein glycotransferase activity	6
	dopamine beta-monooxygenase activity	6
	galactosyltransferase activity	6
	ligase activity	6
	lyase activity	6
	nuclease activity	6
	oxidoreductase activity, acting on CH-OH group of donors	6
	phosphoglycerate kinase activity	6
	phosphoric diester hydrolase activity	6
	protein transporter activity	6
	Rab GTPase activator activity	6
	receptor activity	6
	ribonucleoside-diphosphate reductase activity	6
	serine-type carboxypeptidase activity	6
	3'-5'-exoribonuclease activity	5
	4 iron, 4 sulfur cluster binding	5
	7S RNA binding	5
	antioxidant activity	5
	catalase activity	5
	copper ion binding	5
	deaminase activity	5
	DNA clamp loader activity	5
	FMN binding	5
	glycerol-3-phosphate dehydrogenase (NAD+) activity	5
	GTPase activator activity	5
	hydrolase activity, acting on carbon-nitrogen (but not peptide) bonds, in linear amidines	5
	intramolecular transferase activity, phosphotransferases	5
	L-ascorbic acid binding	5
	metalloexopeptidase activity	5
	N-acetyltransferase activity	5
	NADP or NADPH binding	5
	nucleoside transmembrane transporter activity	5
	nucleotidyltransferase activity	5
	oxygen binding	5
	peptidase activity	5
	protein serine/threonine phosphatase activity	5
	receptor binding	5
	transferase activity, transferring acyl groups other than amino-acyl groups	5
	transition metal ion binding	5
	triose-phosphate isomerase activity	5
	ubiquitin protein ligase binding	5
	5'-nucleotidase activity	4
	acetylglucosaminyltransferase activity	4
	adenylosuccinate synthase activity	4
	amino acid binding	4
	aminomethyltransferase activity	4
	bile acid	4
	biotin binding	4
	carboxy-lyase activity	4
	chitin binding	4
	cobalamin binding	4
	cofactor binding	4
	cytochrome-c oxidase activity	4
	damaged DNA binding	4
	endonuclease activity	4
	exonuclease activity	4
	formate-tetrahydrofolate ligase activity	4
	fructose-bisphosphate aldolase activity	4
	glutaminase activity	4
	glutamine-tRNA ligase activity	4
	glycine hydroxymethyltransferase activity	4
	guanyl nucleotide binding	4
	inositol or phosphatidylinositol kinase activity	4
	lysine-tRNA ligase activity	4
	malate dehydrogenase activity	4
	oxidoreductase activity, acting on the aldehyde or oxo group of donors, disulfide as acceptor	4
	phosphoinositide binding	4
	phosphoric ester hydrolase activity	4
	phosphorylase activity	4
	pseudouridine synthase activity	4
	ribonucleoside binding	4
	small protein activating enzyme activity	4
	solute	4
	sulfate adenylyltransferase (ATP) activity	4
	thiamin pyrophosphate binding	4
	transcription initiation factor activity	4
	transferase activity, transferring phosphorus-containing groups	4
	voltage-gated chloride channel activity	4
	acyl-CoA oxidase activity	3
	aldehyde dehydrogenase [NAD(P)+] activity	3
	ATP citrate synthase activity	3
	ATP-dependent DNA helicase activity	3
	branched-chain-amino-acid transaminase activity	3
	calmodulin binding	3
	carbohydrate binding	3
	cation channel activity	3
	chaperone binding	3
	chromatin binding	3
	diacylglycerol kinase activity	3
	DNA helicase activity	3
	DNA topoisomerase type I activity	3
	DNA-dependent ATPase activity	3
	endopeptidase activity	3
	ER retention sequence binding	3
	extracellular matrix structural constituent	3
	ferric iron binding	3
	gamma-glutamyltransferase activity	3
	GDP-mannose 4,6-dehydratase activity	3
	glucosylceramidase activity	3
	glutamate-ammonia ligase activity	3
	glycerophosphodiester phosphodiesterase activity	3
	glycine-tRNA ligase activity	3
	histone deacetylase activity	3
	hormone activity	3
	hydrolase activity, acting on carbon-nitrogen (but not peptide) bonds, in linear amides	3
	inorganic diphosphatase activity	3
	inositol trisphosphate 3-kinase activity	3
	inositol-3-phosphate synthase activity	3
	intramolecular transferase activity	3
	isocitrate dehydrogenase (NADP+) activity	3
	kinase activity	3
	ligase activity, forming aminoacyl-tRNA and related compounds	3
	L-lactate dehydrogenase activity	3
	NAD binding	3
	oxidoreductase activity, acting on diphenols and related substances as donors	3
	oxidoreductase activity, acting on paired donors, with incorporation or reduction of molecular oxygen	3
	phenylalanine-tRNA ligase activity	3
	phosphogluconate dehydrogenase (decarboxylating) activity	3
	phosphoinositide phospholipase C activity	3
	polo kinase kinase activity	3
	potassium ion binding	3
	P-P-bond-hydrolysis-driven protein transmembrane transporter activity	3
	protein domain specific binding	3
	protein-L-isoaspartate (D-aspartate) O-methyltransferase activity	3
	pyruvate kinase activity	3
	quinone binding	3
	Rho guanyl-nucleotide exchange factor activity	3
	ribonuclease III activity	3
	ribosome binding	3
	rRNA binding	3
		3
	succinate-CoA ligase (ADP-forming) activity	3
	sugar	3
	transferase activity, transferring acyl groups, acyl groups converted into alkyl on transfer	3
	transferase activity, transferring pentosyl groups	3
	tRNA binding	3
	tRNA dihydrouridine synthase activity	3
	tryptophan-tRNA ligase activity	3
	tubulin-tyrosine ligase activity	3
	ubiquitin-protein ligase activity	3
	UDP-glucose	3
	xylose isomerase activity	3
	3',5'-cyclic-nucleotide phosphodiesterase activity	2
	3'-5' exonuclease activity	2
	4-aminobutyrate transaminase activity	2
	5S rRNA binding	2
	acyl-CoA thioesterase activity	2
	adenosine deaminase activity	2
	adenosine kinase activity	2
	adenylate kinase activity	2
	alanine-tRNA ligase activity	2
	ammonia ligase activity	2
	arginyltransferase activity	2
	asparagine synthase (glutamine-hydrolyzing) activity	2
	ATPase activator activity	2
	ATP-dependent peptidase activity	2
	carbonate dehydratase activity	2
	carboxyl- or carbamoyltransferase activity	2
	carboxylesterase activity	2
	copper ion transmembrane transporter activity	2
	CTP synthase activity	2
	cysteine-tRNA ligase activity	2
	deoxyribose-phosphate aldolase activity	2
	dihydrolipoyl dehydrogenase activity	2
	dihydrolipoyllysine-residue (2-methylpropanoyl)transferase activity	2
	dihydroorotate dehydrogenase activity	2
	dipeptidyl-peptidase activity	2
	DNA ligase (ATP) activity	2
	DNA primase activity	2
	DNA topoisomerase (ATP-hydrolyzing) activity	2
	endodeoxyribonuclease activity, producing 5'-phosphomonoesters	2
	enzyme inhibitor activity	2
	enzyme regulator activity	2
	fucosyltransferase activity	2
	glucose-6-phosphate dehydrogenase activity	2
	glutathione peroxidase activity	2
	glyceraldehyde-3-phosphate dehydrogenase activity	2
	glycerone kinase activity	2
	glycine dehydrogenase (decarboxylating) activity	2
	glycylpeptide N-tetradecanoyltransferase activity	2
	G-protein coupled receptor activity	2
	hexokinase activity	2
	histidine-tRNA ligase activity	2
	hydrogen-exporting ATPase activity, phosphorylative mechanism	2
	hydroxymethyl-, formyl- and related transferase activity	2
	hydroxymethylglutaryl-CoA reductase (NADPH) activity	2
	inositol or phosphatidylinositol phosphatase activity	2
	isoleucine-tRNA ligase activity	2
	isomerase activity	2
	lactoylglutathione lyase activity	2
	lipase activity	2
	lipoate synthase activity	2
	L-malate dehydrogenase activity	2
	molybdenum ion binding	2
	NAD(P) transhydrogenase activity	2
	NAD+ kinase activity	2
	NADH dehydrogenase activity	2
	nucleosome binding	2
	oxidoreductase activity, acting on sulfur group of donors, disulfide as acceptor	2
	palmitoyl-(protein) hydrolase activity	2
	peroxidase activity	2
	phosphatidylserine decarboxylase activity	2
	phosphoglycerate dehydrogenase activity	2
	phosphoinositide 3-kinase regulator activity	2
	phospholipase C activity	2
	phosphopantetheine binding	2
	phosphoribosylaminoimidazolesuccinocarboxamide synthase activity	2
	prenyltransferase activity	2
	proline dehydrogenase activity	2
	protein homodimerization activity	2
	protein kinase regulator activity	2
	protein phosphatase type 2A regulator activity	2
	racemase and epimerase activity, acting on amino acids and derivatives	2
	ribonuclease H activity	2
	selenium binding	2
	single-stranded DNA binding	2
	small GTPase regulator activity	2
	sodium channel activity	2
	sterol carrier activity	2
	structural constituent of nuclear pore	2
	succinate dehydrogenase activity	2
	thiol oxidase activity	2
	thioredoxin-disulfide reductase activity	2
	transferase activity, transferring acyl groups	2
	trimethyllysine dioxygenase activity	2
	tRNA (adenine-N1-)-methyltransferase activity	2
	tRNA (guanine-N2-)-methyltransferase activity	2
	ubiquinol-cytochrome-c reductase activity	2
	valine-tRNA ligase activity	2
	voltage-gated anion channel activity	2
	1-alkyl-2-acetylglycerophosphocholine esterase activity	1
	3-beta-hydroxy-delta5-steroid dehydrogenase activity	1
	4-hydroxyphenylpyruvate dioxygenase activity	1
	6-phosphogluconolactonase activity	1
	aconitate hydratase activity	1
	acyl carrier activity	1
	acyl-CoA binding	1
	adenosylhomocysteinase activity	1
	adenosylmethionine decarboxylase activity	1
	adenylate cyclase activity	1
	adenyl-nucleotide exchange factor activity	1
	alpha-1,3-mannosylglycoprotein 2-beta-N-acetylglucosaminyltransferase activity	1
	alpha-L-fucosidase activity	1
	amidophosphoribosyltransferase activity	1
	aminoacyl-tRNA hydrolase activity	1
	ammonium transmembrane transporter activity	1
	anion exchanger activity	1
	arginase activity	1
	aspartate-tRNA ligase activity	1
	ATPase activity, uncoupled	1
	biotin-[acetyl-CoA-carboxylase] ligase activity	1
	C-8 sterol isomerase activity	1
	calcium-activated potassium channel activity	1
	calmodulin-dependent protein kinase activity	1
	chitinase activity	1
	cyanate hydratase activity	1
	cysteine synthase activity	1
	cysteine-type endopeptidase inhibitor activity	1
	cytoskeletal adaptor activity	1
	cytoskeletal protein binding	1
	DNA polymerase processivity factor activity	1
	dUTP diphosphatase activity	1
	electron-transferring-flavoprotein dehydrogenase activity	1
	endopeptidase inhibitor activity	1
	exodeoxyribonuclease III activity	1
	flavin-containing monooxygenase activity	1
	galactokinase activity	1
	galactosylgalactosylxylosylprotein 3-beta-glucuronosyltransferase activity	1
	general RNA polymerase II transcription factor activity	1
	glucose-6-phosphate isomerase activity	1
	glutathione synthase activity	1
	glycerol kinase activity	1
	glycine C-acetyltransferase activity	1
	glycolipid binding	1
	glycolipid transporter activity	1
	growth factor activity	1
	GTP cyclohydrolase I activity	1
	GTPase binding	1
	histone acetyltransferase activity	1
	histone-lysine N-methyltransferase activity	1
	holo-[acyl-carrier-protein] synthase activity	1
	hydroxymethylglutaryl-CoA synthase activity	1
	hypoxanthine phosphoribosyltransferase activity	1
	IMP cyclohydrolase activity	1
	indole-3-glycerol-phosphate synthase activity	1
	inorganic anion exchanger activity	1
	inorganic phosphate transmembrane transporter activity	1
	inositol pentakisphosphate 2-kinase activity	1
	isopentenyl-diphosphate delta-isomerase activity	1
	kinesin binding	1
	kynureninase activity	1
	malate synthase activity	1
	manganese ion binding	1
	mannosidase activity	1
	mannosyl-oligosaccharide glucosidase activity	1
	MAP kinase activity	1
	metalloendopeptidase inhibitor activity	1
	methionine adenosyltransferase activity	1
	methionine synthase activity	1
	methylmalonyl-CoA mutase activity	1
	microtubule binding	1
	mRNA guanylyltransferase activity	1
	neurotransmitter	1
	nicotinate phosphoribosyltransferase activity	1
	nitrite reductase [NAD(P)H] activity	1
	nitrogenase activity	1
	non-G-protein coupled 7TM receptor activity	1
	nucleoside diphosphate kinase activity	1
	nucleotide kinase activity	1
	olfactory receptor activity	1
	ornithine decarboxylase inhibitor activity	1
	oxidoreductase activity, acting on paired donors, with incorporation or reduction of molecular oxygen, NADH or NADPH as one donor, and incorporation of one atom of oxygen	1
	oxidoreductase activity, acting on the CH-NH2 group of donors	1
	oxoglutarate dehydrogenase (succinyl-transferring) activity	1
	pantothenate kinase activity	1
	phosphatase activator activity	1
	phosphatidylcholine-sterol O-acyltransferase activity	1
	phosphatidylinositol phosphate kinase activity	1
	phosphoglycerate mutase activity	1
	phospholipid binding	1
	phosphoprotein phosphatase activity	1
	phosphoprotein phosphatase inhibitor activity	1
	phosphoribosylaminoimidazole carboxylase activity	1
	phosphoribosylaminoimidazolecarboxamide formyltransferase activity	1
	phosphoribosylglycinamide formyltransferase activity	1
	phosphorus-oxygen lyase activity	1
	phosphorylase kinase activity	1
	phosphotransferase activity, for other substituted phosphate groups	1
	phosphotransferase activity, phosphate group as acceptor	1
	poly(ADP-ribose) glycohydrolase activity	1
	procollagen-lysine 5-dioxygenase activity	1
	proline-tRNA ligase activity	1
	protein histidine kinase activity	1
	protein kinase C activity	1
	protein prenyltransferase activity	1
	purine-nucleoside phosphorylase activity	1
	pyridoxamine-phosphate oxidase activity	1
	pyrroline-5-carboxylate reductase activity	1
	ribose-5-phosphate isomerase activity	1
	RNA methyltransferase activity	1
	rRNA (adenine-N6,N6-)-dimethyltransferase activity	1
	rRNA methyltransferase activity	1
	S-(hydroxymethyl)glutathione dehydrogenase activity	1
	selenide, water dikinase activity	1
	S-formylglutathione hydrolase activity	1
	SH3 domain binding	1
	shikimate 5-dehydrogenase activity	1
	SNAP receptor activity	1
	sodium	1
	strictosidine synthase activity	1
	syntaxin binding	1
	thiamin diphosphokinase activity	1
	thiosulfate sulfurtransferase activity	1
	thymidylate synthase activity	1
	transaldolase activity	1
	transcription activator activity	1
	transcription cofactor activity	1
	translation release factor activity, codon specific	1
	transmembrane receptor activity	1
	transmembrane receptor protein serine/threonine kinase activity	1
	tRNA-intron endonuclease activity	1
	tropomyosin binding	1
	two-component sensor activity	1
	UDP-glucose 4-epimerase activity	1
	uracil DNA N-glycosylase activity	1
	uridine phosphorylase activity	1
	urocanate hydratase activity	1
	voltage-gated calcium channel activity	1
	voltage-gated potassium channel activity	1
Molecular Function Total		5788
